# Supplementary material
Source: MDPI journal article supplement (https://www.mdpi.com/2673-527X/1/4/23)
Supplement: s1 [file s1 › jor-1377837-supplementary.pdf]

## Supplementary Materials

**Supplementary Table S1. Clinical characteristics of patients and control subjects**

| Sample type               | Age | Sex    | Pathology diagnosis                                        | Type                |
|---------------------------|-----|--------|------------------------------------------------------------|---------------------|
| Necrotic-1                | 35  | Male   | Tuberculosis (degenerative and necrotic tissue)            | inflammation-severe |
| Necrotic-2                | 39  | Male   | Tuberculosis (exudative inflammation of tuberculosis)      | inflammation-severe |
| Necrotic-3                | 46  | Male   | Tuberculosis (necrotic tissue)                             | inflammation-severe |
| Necrotic-4                | 68  | Male   | Tuberculosis (necrotic tissue)                             | inflammation-severe |
| Necrotic-5                | 75  | Male   | Tuberculosis (sparse) with necrosis                        | inflammation-severe |
| Necrotic-6                | 51  | Female | Tuberculosis with caseous necrosis                         | inflammation-severe |
| Necrotic-7                | 40  | Male   | Tuberculosis (exudative inflammation of tuberculosis)      | inflammation-severe |
| Necrotic-8                | 56  | Male   | Tuberculosis with necrosis                                 | inflammation-severe |
| Necrotic-9                | 60  | Male   | Tuberculosis (mild exudative inflammation of tuberculosis) | inflammation-severe |
| Necrotic-10               | 66  | Female | Tuberculosis with necrotic lesions                         | inflammation-severe |
| Necrotic-11               | 54  | Male   | Tuberculosis with necrotic lesions                         | inflammation-severe |
| Necrotic-12               | 57  | Female | Tuberculosis with necrotic lesions                         | inflammation-severe |
| Necrotic-13               | 50  | Female | Tuberculosis with necrotic lesions                         | inflammation-severe |
| Necrotic-14               | 61  | Female | Tuberculosis with necrotic lesions                         | inflammation-severe |
| Necrotic-15               | 51  | Female | Tuberculosis with necrotic lesions                         | inflammation-severe |
| Necrotic-16               | 39  | Male   | Tuberculosis with necrotic lesions                         | inflammation-severe |
| Necrotic-17               | 60  | Female | Tuberculosis with necrotic lesions                         | inflammation-severe |
| Necrotic-18               | 61  | Female | Tuberculosis with necrotic lesions                         | inflammation-severe |
| Necrotic-19               | 45  | Male   | Tuberculosis with necrotic lesions                         | inflammation-severe |
| Necrotic-20               | 55  | Female | Tuberculosis with necrotic lesions                         | inflammation-severe |
| Necrotic-21               | 48  | Male   | Tuberculosis with necrotic lesions                         | inflammation-severe |
| Necrotic-22               | 59  | Male   | Tuberculosis with necrotic lesions                         | inflammation-severe |
| Necrotic-23               | 35  | Male   | Tuberculosis (degenerative tissue)                         | inflammation-severe |
| Necrotic-24               | 46  | Male   | Tuberculosis (necrotic tissue)                             | inflammation-severe |
| Necrotic-25               | 75  | Male   | Tuberculosis with necrosis                                 | inflammation-severe |
| Necrotic-26               | 60  | Male   | Tuberculosis (mild exudative inflammation)                 | inflammation-severe |
| Cellular (non-necrotic)-1 | 43  | Male   | Tuberculosis                                               | inflammation        |
| Cellular (non-necrotic)-2 | 60  | Female | Tuberculosis                                               | inflammation        |
| Cellular (non-necrotic)-3 | 68  | Male   | Tuberculosis                                               | inflammation        |
| Cellular (non-necrotic)-4 | 49  | Male   | Tuberculosis                                               | inflammation        |
| Cellular (non-necrotic)-5 | 45  | Male   | Tuberculosis                                               | inflammation        |
| Cellular (non-necrotic)-6 | 68  | Male   | Tuberculosis                                               | inflammation        |
| Cellular (non-necrotic)-7 | 75  | Female | Tuberculosis                                               | inflammation        |
| Control-1                 | 48  | Female | Normal pulmonary tissue                                    | normal              |
| Control-2                 | 48  | Male   | Normal pulmonary tissue                                    | normal              |

|           |    |      |                         |        |
|-----------|----|------|-------------------------|--------|
| Control-3 | 24 | Male | Normal pulmonary tissue | normal |
| Control-4 | 55 | Male | Normal pulmonary tissue | normal |

**Note:** All patients were diagnosed with tuberculosis and all the control subjects did not have any pulmonary infection.

**Supplementary Figure S1**

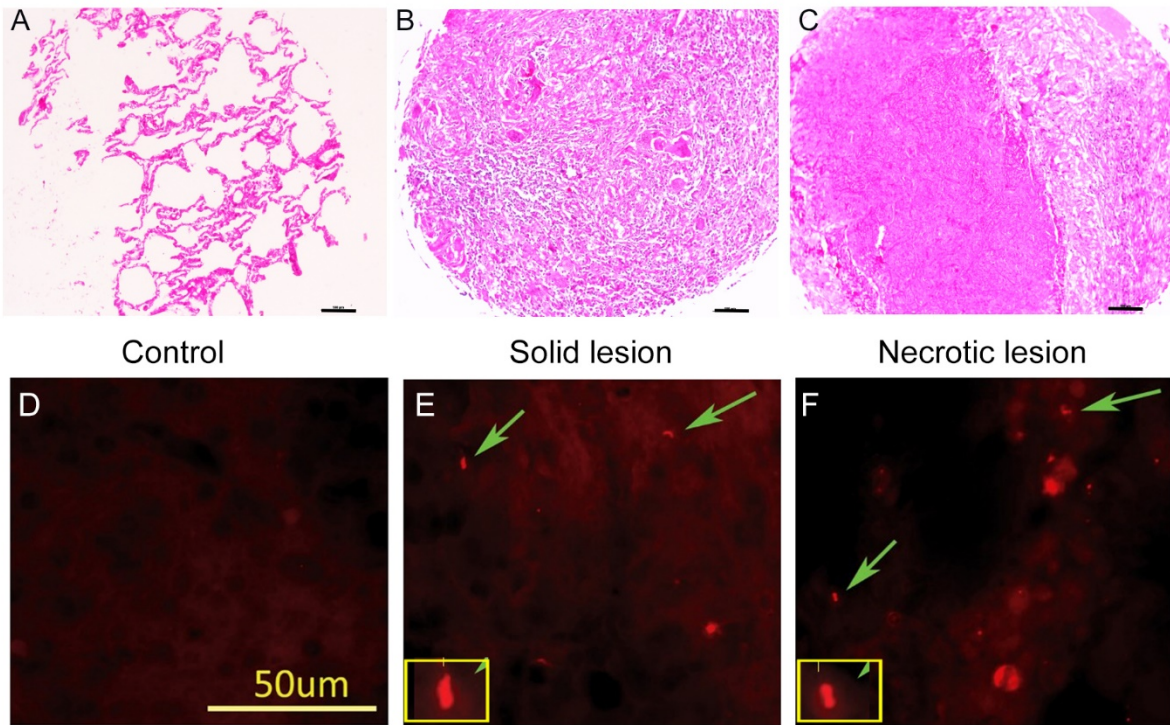

**Supplementary Figure S1.** Representative images of H&E stained lung sections of patients with lung TB. **A, D.** Control (lung tissue not involved in granuloma formation) **B, E.** solid/non-necrotic granuloma; **C, F.** Necrotic lesion. Green arrows in **E** and **F** indicate acid-fast bacilli (red spots). Scale bar in **A-C** is 100 microns. Scale bar in **D** (50 microns) is common for images **D-F**.

Supplementary Figure S2

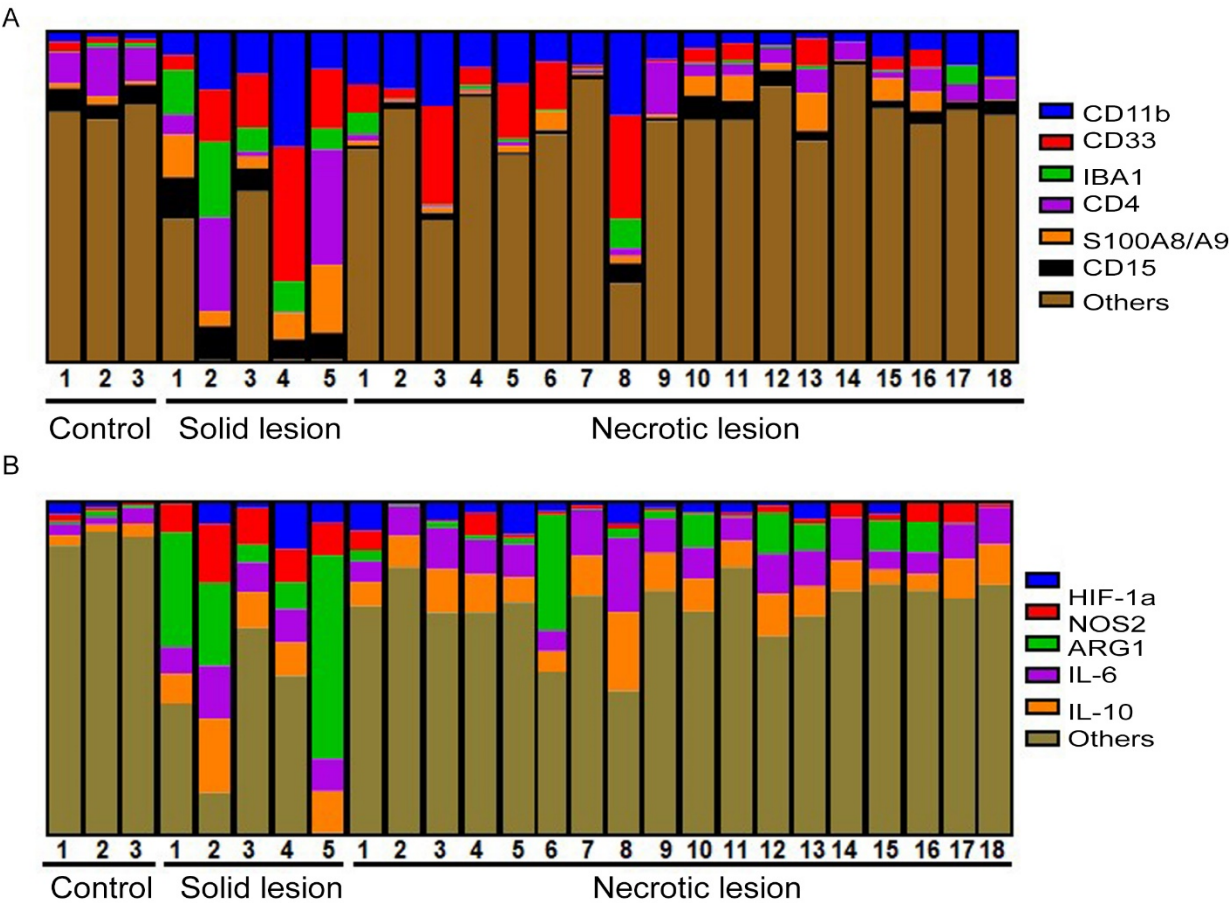

**Supplementary Figure S2. A.** Proportion of various host immune cells expressing effector molecules (HIF-1 $\alpha$ , NOS2, ARG1, IL-6, IL-10) in the individual samples of control and solid or necrotic granulomas. **B.** Proportion of various host immune cells expressing surface markers (CD11b, CD33, IBA1, CD4, S100A8/A9, CD15) in the individual samples of control and solid or necrotic granulomas.
